# Supplementary material for: Cofilin Inhibitor Protects against Traumatic Brain Injury-Induced Oxidative Stress and Neuroinflammation
Source: MDPI journal article supplement (doi:10.3390/biology12040630), 2023-04-21
Supplement: s1 [file s1]

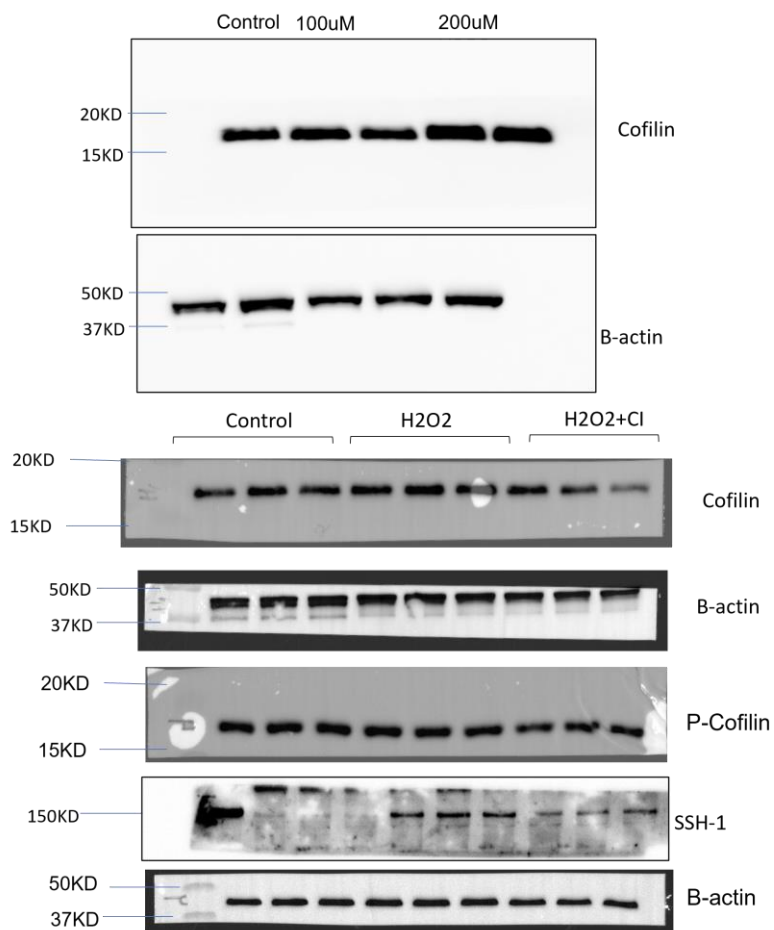

Figure S1: Original western blot for Figure 1 showing the bands with molecular weight markers.

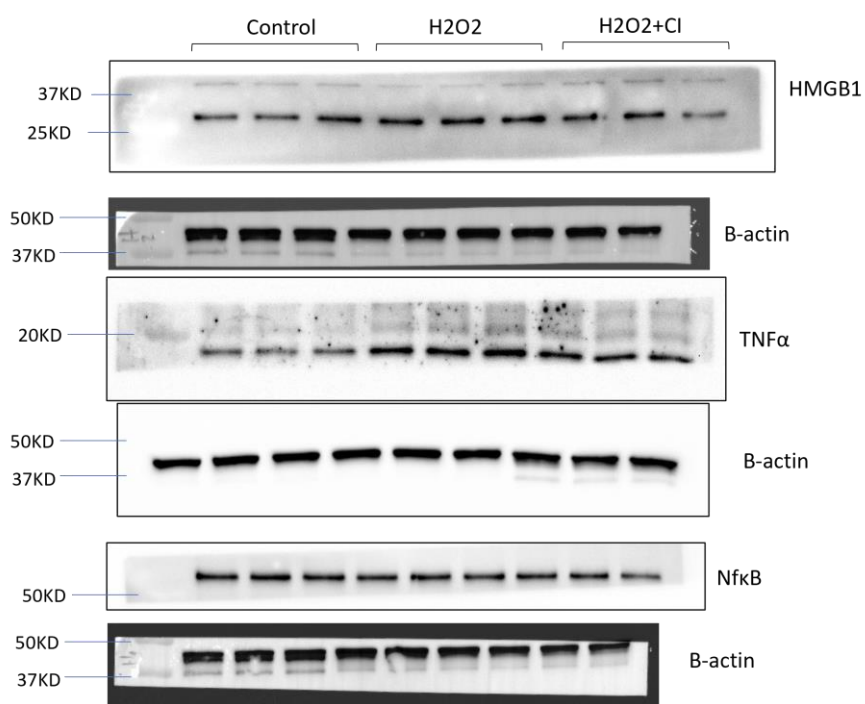

Figure S2: Original western blot for Figure 2 showing the bands with molecular weight markers.

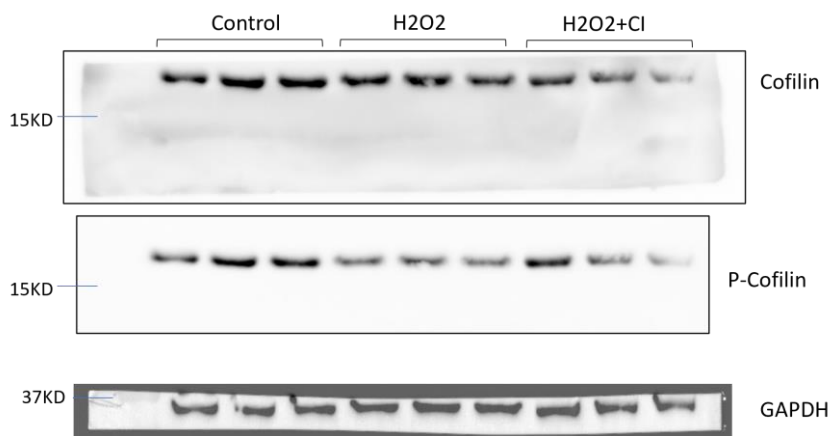

Figure S3: Original western blot for Figure 3 showing the bands with molecular weight markers.

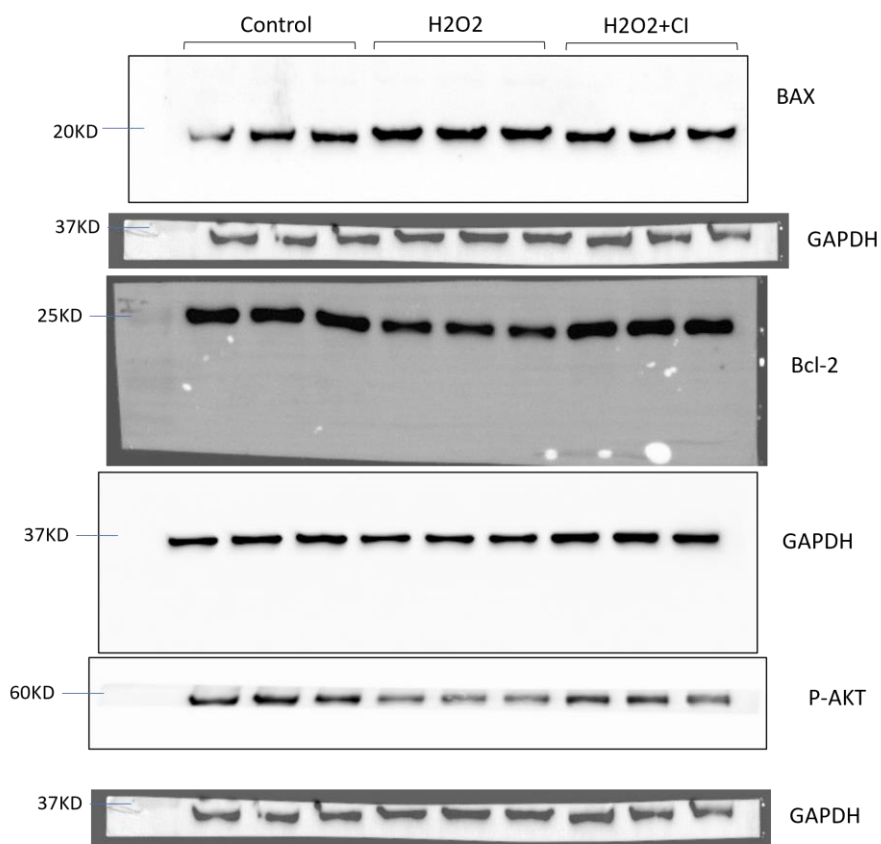

Figure S4: Original western blot for Figure 5 showing the bands with molecular weight markers.

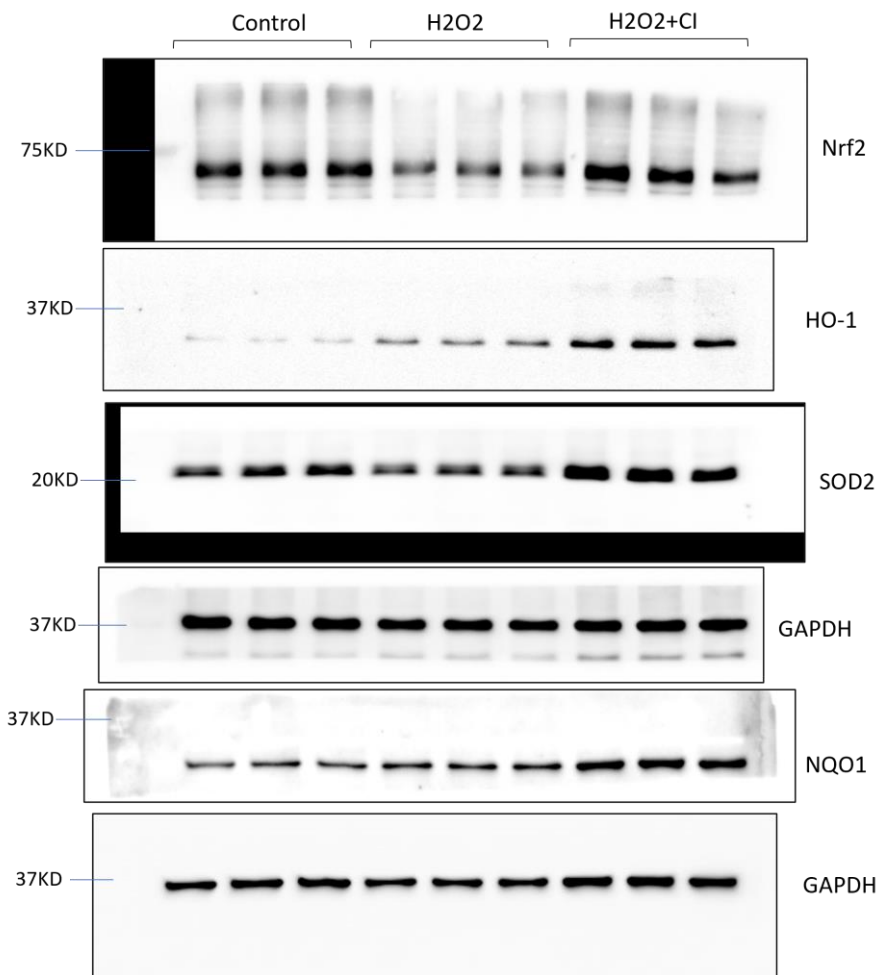

Figure S5: Original western blot for Figure 6 showing the bands with molecular weight markers.

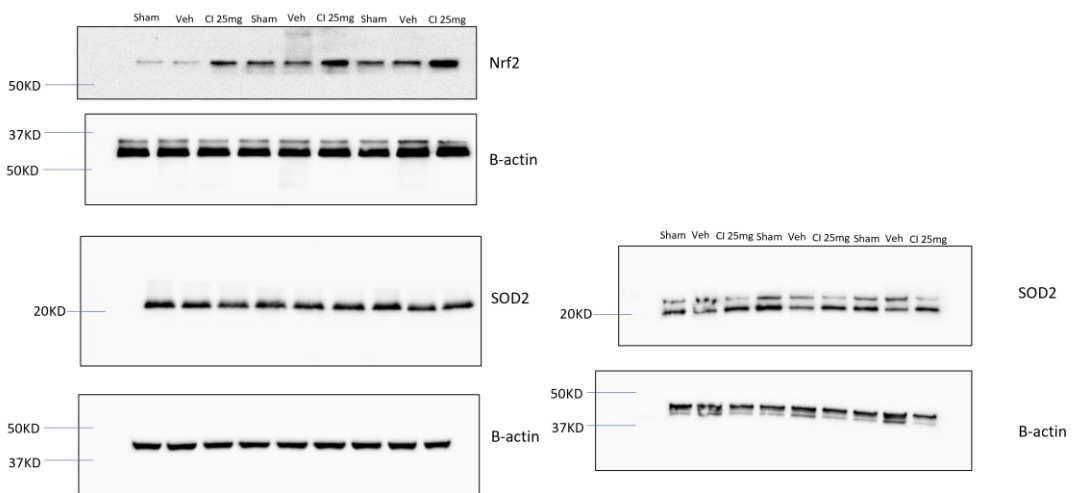

Figure S6: Original western blot for Figure 7 showing the bands with molecular weight markers.
